# Supplementary material for: Nocturnal non-speech sound classification with multi-spectrogram feature fusion and an attention-based stacked hybrid convolutional bidirectional long short-term memory–vision transformer architecture
Source: PeerJ journal article supplement (doi:10.7717/peerj-cs.3536), 2026-02-02
Supplement: Read_me.pdf [file Read_me.pdf]

## Hybrid ViT-Based Sleep Sound Classification

### Description

This repository contains all code and materials for a deep learning-based sleep sound classification study using hybrid ViT + CNN + BiLSTM + Attention architectures. We process audio signals into spectrogram images (Mel, MFCC, CQT), apply SpecAugment for robustness, and utilize ensemble learning (average, weighted, stacking) to improve accuracy. The final model performs 10-fold cross-validation and is benchmarked against multiple ensemble strategies.

---

### Dataset Information

- This study utilized a publicly available dataset originally introduced by Akbal and Tuncer (2021) in their article titled “FusedTSNet: An automated nocturnal sleep sound classification method based on a fused textural and statistical feature generation network” published in Applied Acoustics (Vol. 171, Article 107559). The dataset is openly accessible for academic research, and detailed access information is provided in the original publication: <https://doi.org/10.1016/j.apacoust.2020.107559>.
- **Input:** 700 sleep sound samples in .wav format, 48kHz, 4–8 seconds each, across 7 classes.
- **Class Labels:**
- 0: Cough, 1: Laugh, 2: Scream, 3: Sneeze, 4: Snore, 5: Sniffle, 6: Farting
- **Spectrograms Used:**
  - Mel Spectrogram
  - MFCC
  - CQT

Original audio files are stored under: SLEEP/nocturnal\_wav/

Spectrogram images are saved to: SLEEP/mel/, SLEEP/mfcc/, SLEEP/cqt/

---

## Code Information

| File                                              | Description                                                                     |
|---------------------------------------------------|---------------------------------------------------------------------------------|
| 1-ensemble_from_wav_multibranch_regularization.py | Extracts spectrograms, trains hybrid models on each branch, performs 10-fold CV |
| 2-save_branch_predictions.py                      | Loads trained models and saves softmax outputs (y_prob) for each fold           |
| 3-evaluate_branches_10fold.py                     | Evaluates each branch model and plots confusion matrices                        |
| 4-weighted_ensemble_evaluation.py                 | Performs weighted softmax ensemble based on individual model accuracies         |
| 5-stacking_logreg.py                              | Applies Logistic Regression stacking using concatenated softmax vectors         |
| 6-stacking_xgboost.py                             | Applies XGBoost stacking for final predictions                                  |
| 7-confidence_distribution.py                      | Visualizes softmax confidence histograms for each model branch                  |
| 8-pca&tsne.py                                     | Visualizes softmax vectors using PCA and t-SNE                                  |

---

## Requirements

Install required Python packages with:

```
pip install -r requirements.txt
```

---

## Methodology

- Each .wav file is converted into 3 spectrogram types.
  - A **hybrid model** combining CNN + BiLSTM + Attention + ViT is trained per branch.
  - **SpecAugment** is applied during training for augmentation.
  - **10-fold stratified cross-validation** is used for evaluation.
  - Final classification is conducted using:
    - Average Softmax Ensemble
    - Weighted Ensemble
    - Stacking (LogReg and XGBoost)
- 

## Evaluation Method

- **Cross-validation:** 10-fold stratified
  - **Comparative Baselines:** Individual branches, average ensemble, weighted ensemble, stacking
  - **Visualization:** Confusion matrices, ROC curves, t-SNE, PCA
- 

## Assessment Metrics

The following metrics are used and reported for each experiment:

- **Accuracy**
  - **Precision**
  - **Recall**
  - **F1-score**
  - **AUC (macro average)**
-

## Usage Instructions

To run a full training and evaluation pipeline:

```
python 1-ensemble_from_wav_multibranch_regularization.py
```

```
python 2-save_branch_predictions.py
```

```
python 3-evaluate_branches_10fold.py
```

```
python 4-weighted_ensemble_evaluation.py
```

```
python 5-stacking_logreg.py
```

```
python 6-stacking_xgboost.py
```

```
python 7-confidence_distribution.py
```

```
python 8-pca&tsne.py
```

Outputs (e.g., .npy, .png, .txt) are saved in:

SLEEP/results\_ensemble\_multibranch/

---

## Citations

If you use this repository, please cite the associated research article:

Sağbaşı E.A., Nocturnal sleep sound classification with multi-spectrogram feature fusion and an attention-based stacked hybrid ConvBiLSTM-ViT architecture, PeerJ Computer Science, Under Review.
